# Supplementary material for: Compartmentalized effects of aging on group 2 innate lymphoid cell development and function
Source: PubMed Central journal article supplement (PMC6826140; doi:10.1111/acel.13019), 2019-08-20

Figure S1

A

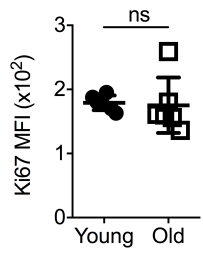

B

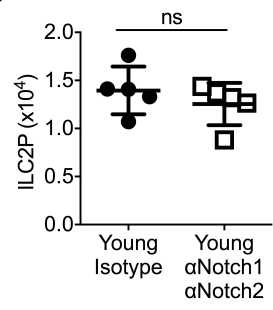

Supplement: ACEL-18-e13019-s001.pdf [file ACEL-18-e13019-s001.pdf]
